# Supplementary material
Source: bioRxiv or medRxiv preprint supplement (https://www.biorxiv.org/content/biorxiv/early/2019/11/04/830067/DC1/embed/media-1.pdf)
Supplement: Supplementary file [file media-1.pdf]

**Supplementary Table 1.** Bayesian ANOVA results comparing the signal-to-noise ratio, Shannon entropy and average correlation between the different S-R category templates under declarative and procedural formats. The table presents  $BF_{10}$  values ( $BF_{10} < 0.3$  can be interpreted as strong evidence for a null effect). The observed values are overall within this range, suggesting similar signal-to-noise, informational density and average correlation between templates of different format and S-R category.

|             | Signal-to-noise ratio |          |       | Shannon entropy |          |       | Average correlation |          |       |
|-------------|-----------------------|----------|-------|-----------------|----------|-------|---------------------|----------|-------|
|             | Format                | Category | F*C   | Format          | Category | F*C   | Format              | Category | F*C   |
| <b>IPFC</b> | 0.292                 | 0.05     | 0.056 | 0.164           | 0.03     | 0.067 | 0.229               | 0.029    | 0.065 |
| <b>rPFC</b> | 0.209                 | 0.027    | 0.085 | 0.208           | 0.031    | 0.091 | 0.186               | 0.03     | 0.063 |
| <b>IPar</b> | 0.151                 | 0.028    | 0.061 | 0.425           | 0.037    | 0.095 | 0.236               | 0.027    | 0.066 |
| <b>rPar</b> | 0.151                 | 0.026    | 0.059 | 0.442           | 0.043    | 0.069 | 0.153               | 0.031    | 0.061 |
| <b>VVC</b>  | 0.15                  | 0.062    | 0.097 | 0.149           | 0.043    | 0.165 | 0.358               | 0.026    | 0.065 |
| <b>M1</b>   | 0.406                 | 0.059    | 0.065 | 0.498           | 0.046    | 0.08  | 0.0151              | 0.028    | 0.066 |
